# Supplementary material for: Prevalence of Eligibility Criteria for the Systolic Blood Pressure Intervention Trial in US Adults Among Excluded Groups: Age <50 Years, Diabetes Mellitus, or a History of Stroke
Source: PubMed Central journal article supplement — J Am Heart Assoc. 2016 Jul 12;5(7):e003547. doi: 10.1161/JAHA.116.003547 (PMC5015392; doi:10.1161/jaha.116.003547), 2016-07-12
Supplement: JAH3-5-e003547-s001.pdf [file JAH3-5-e003547-s001.pdf]

## **SUPPLEMENTAL MATERIAL**

**Table S1. Percentage of US adults < 50 years of age meeting each sequential SPRINT eligibility criteria, overall and in subgroups**

|                      | US adult population < 50 years of age |                       |                                 |                                 |
|----------------------|---------------------------------------|-----------------------|---------------------------------|---------------------------------|
|                      | US adults age <50<br>in millions      | Met SBP criteria      | + High CVD risk condition       | + No exclusion criteria         |
| Overall              | 124.3 (118.2 – 130.5)                 | 13.3% (12.6% - 14.0%) | 1.6% (1.4% - 1.9%)              | 1.0% (0.8% - 1.3%)              |
| Age group, years     |                                       |                       |                                 |                                 |
| <30                  | 40.7 (37.9 – 43.4)                    | 7.7% (6.8% - 8.7%)    | 0.1% (0.0% - 0.4%) <sup>†</sup> | 0.1% (0.0% - 0.4%) <sup>†</sup> |
| 30 – 39              | 39.9 (37.6 – 42.1)                    | 11.8% (10.5% - 13.2%) | 0.4% (0.2% - 0.6%)              | 0.3% (0.1% - 0.5%)              |
| 40 – 49              | 43.8 (40.8 – 46.8)                    | 19.9% (18.5% - 21.4%) | 4.2% (3.5% - 5.0%)              | 2.6% (2.1% - 3.3%)              |
| Male                 | 61.4 (58.4 – 64.4)                    | 17.8% (16.7% - 18.9%) | 2.5% (2.1% - 3.1%)              | 1.7% (1.3% - 2.1%)              |
| Female               | 62.9 (59.5 – 66.4)                    | 9.0% (8.2% - 9.7%)    | 0.8% (0.5% - 1.1%)              | 0.4% (0.3% - 0.7%)              |
| Race-ethnicity       |                                       |                       |                                 |                                 |
| Non-Hispanic white   | 79.4 (72.1 – 86.6)                    | 12.4% (11.4% - 13.5%) | 1.5% (1.2% - 1.9%)              | 1.1% (0.8% - 1.4%)              |
| Non-Hispanic black   | 15.6 (13.7 – 17.4)                    | 21.5% (19.7% - 23.3%) | 2.6% (2.1% - 3.3%)              | 1.2% (0.9% - 1.7%)              |
| Hispanic             | 20.6 (18.0 – 23.2)                    | 12.0% (10.9% - 13.2%) | 1.4% (1.1% - 1.9%)              | 0.7% (0.5% - 1.0%)              |
| SBP, mm Hg           |                                       |                       |                                 |                                 |
| 130 – 139            | 10.5 (9.5 – 11.4)                     | 99.9% (99.7% - 100%)  | 9.3% (7.4% - 11.5%)             | 6.1% (4.5% - 8.2%)              |
| ≥ 140                | 6.4 (5.7 – 7.1)                       | 95.0% (92.6% - 96.6%) | 16.5% (13.6% - 19.9%)           | 9.9% (7.5% - 12.8%)             |
| Treated hypertension |                                       |                       |                                 |                                 |
| No                   | 115.6 (109.9 – 121.3)                 | 11.9% (11.2% - 12.6%) | 1.1% (0.8% - 1.3%)              | 0.8% (0.6% - 1.0%)              |
| Yes                  | 8.8 (7.9 – 9.7)                       | 32.3% (28.5% - 36.2%) | 9.4% (7.4% - 11.8%)             | 4.6% (3.3% - 6.4%)              |

Numbers in table are million people (95% confidence interval) or percentage (95% confidence interval).

<sup>†</sup> Calculations for these cells are based on small (n< 30) sample sizes and should be interpreted with caution.

CHD – Coronary heart disease; CVD – cardiovascular disease; NHANES – National Health and Nutrition Examination Survey; SBP – systolic blood pressure; SPRINT - Systolic Blood Pressure Intervention Trial.

Treated hypertension was defined by self-reported use of antihypertensive medication with one or more classes of antihypertensive medication identified through the pill bottle review.

SBP criteria include: 130–180 mm Hg on 0 or 1 antihypertensive medication class, 130–170 mm Hg on up to 2 classes, 130–160 mm Hg on up to 3 classes, 130–150 mm Hg on up to 4 classes.

Criteria for high CVD risk condition include: history of CHD (defined in NHANES as self-report of a prior diagnosis of myocardial infarction, angina, or CHD), eGFR of <60 ml/min/1.73 m<sup>2</sup>, 10-year risk for CVD ≥ 15% calculated using the Framingham risk score for general clinical practice.<sup>1</sup>

Exclusion criteria include diabetes, history of stroke, > 1gram proteinuria in 24 hours, heart failure, estimated glomerular filtration rate < 20 ml/min/1.73 m<sup>2</sup> or dialysis treatment in the past year.

**Table S2. Percentage of US adults with diabetes (top panel) and history of stroke (bottom panel) meeting each sequential SPRINT eligibility criteria, overall and in subgroups**

|                      | <b>Diabetes</b>              |                       |                          |                                  |                                 |
|----------------------|------------------------------|-----------------------|--------------------------|----------------------------------|---------------------------------|
|                      | <b>US adults in millions</b> | <b>Age ≥ 50</b>       | <b>+ SBP criteria</b>    | <b>+ High CVD risk condition</b> | <b>+ No exclusion criteria*</b> |
| Overall              | 21.6 (19.9 – 23.2)           | 77.2% (74.7% - 79.5%) | 34.7% (32.4% - 36.8%)    | 32.2% (30.2% - 34.3%)            | 25.4% (23.4% - 27.6%)           |
| Age group, years     |                              |                       |                          |                                  |                                 |
| 50 – 59              | 5.5 (4.9 – 6.2)              | 100%                  | 33.2% (28.3% - 38.5%)    | 27.1% (22.3% - 32.4%)            | 23.9% (19.4% - 29.1%)           |
| 60 – 74              | 7.6 (6.8 – 8.3)              | 100%                  | 49.8% (46.8% - 52.8%)    | 47.3% (44.2% - 50.4%)            | 37.9% (34.6% - 41.3%)           |
| ≥ 75                 | 3.5 (3.1 – 3.9)              | 100%                  | 52.9% (48.8% - 56.9%)    | 52.9% (48.8% - 56.9%)            | 36.3% (32.2% - 40.6%)           |
| Male                 | 10.9 (10.0 – 11.9)           | 75.4% (72.1% - 78.4%) | 32.1% (28.9% - 35.4%)    | 31.0% (27.9% - 34.3%)            | 26.4% (23.4% - 29.5%)           |
| Female               | 10.6 (9.7 – 11.6)            | 79.1% (76.1% - 81.8%) | 37.3% (34.5% - 40.2%)    | 33.5% (30.8% - 36.2%)            | 24.4% (22.0% - 27.0%)           |
| Race-ethnicity       |                              |                       |                          |                                  |                                 |
| Non-Hispanic white   | 13.1 (11.3 – 14.9)           | 82.6% (79.7% - 85.2%) | 37.4% (34.3% - 40.6%)    | 35.5% (32.4% - 38.6%)            | 27.6% (24.4% - 30.9%)           |
| Non-Hispanic black   | 3.6 (3.2 – 4.1)              | 71.9% (68.2% - 75.4%) | 33.7% (30.6% - 37.0%)    | 29.2% (26.5% - 31.9%)            | 22.5% (20.0% - 25.2%)           |
| Hispanic             | 3.1 (2.5 – 3.8)              | 62.9% (57.2% - 68.3%) | 26.4% (23.1% - 29.9%)    | 25.2% (22.1% - 28.5%)            | 21.2% (18.4% - 24.3%)           |
| SBP, mm Hg           |                              |                       |                          |                                  |                                 |
| 130 – 139            | 4.2 (3.7 – 4.7)              | 78.8% (74.3% - 82.6%) | 77.5% (73.0% - 81.4%)    | 68.4% (63.1% - 73.2%)            | 54.0% (48.7% - 59.2%)           |
| ≥ 140                | 6.0 (5.3 – 6.6)              | 88.8% (85.8% - 91.1%) | 70.4% (67.1% - 73.4%)    | 68.0% (64.8% - 71.0%)            | 53.5% (49.9% - 57.1%)           |
| Treated hypertension |                              |                       |                          |                                  |                                 |
| No                   | 9.5 (8.5 – 10.5)             | 65.5% (62.1% - 68.8%) | 27.7% (24.4% - 31.3%)    | 25.5% (22.4% - 28.9%)            | 21.3% (18.4% - 24.6%)           |
| Yes                  | 12.1 (11.1 – 13.0)           | 86.4% (83.6% - 88.7%) | 40.1% (37.7% - 42.7%)    | 37.5% (34.9% - 40.1%)            | 28.6% (25.8% - 31.6%)           |
|                      |                              |                       | <b>History of stroke</b> |                                  |                                 |
| Overall              | 6.1 (5.4 – 6.8)              | 82.7% (78.8% - 86.0%) | 39.7% (35.3% - 44.2%)    | 34.9% (31.1% - 38.9%)            | 19.0% (16.0% - 22.4%)           |
| Age group, years     |                              |                       |                          |                                  |                                 |
| 50 – 59              | 0.9 (0.7 – 1.1)              | 100%                  | 37.6% (26.7% - 50.0%)    | 26.8% (18.0% - 37.9%)            | 14.1% (7.1% - 26.0%)            |
| 60 – 74              | 2.1 (1.7 – 2.4)              | 100%                  | 50.6% (44.3% - 56.9%)    | 41.6% (35.5% - 48.0%)            | 19.8% (15.0% - 25.6%)           |
| ≥ 75                 | 2.0 (1.7 – 2.4)              | 100%                  | 49.9% (43.0% - 56.7%)    | 49.9% (43.0% - 56.7%)            | 30.4% (25.6% - 35.5%)           |
| Male                 | 2.6 (2.2 – 2.9)              | 89.0% (84.3% - 92.4%) | 36.3% (30.3% - 42.7%)    | 34.3% (28.8% - 40.3%)            | 20.5% (15.9% - 26.1%)           |
| Female               | 3.5 (3.0 – 4.1)              | 78.1% (72.8% - 82.7%) | 42.1% (36.9% - 47.6%)    | 35.4% (31.0% - 40.1%)            | 17.9% (14.2% - 22.3%)           |
| Race-ethnicity       |                              |                       |                          |                                  |                                 |
| Non-Hispanic white   | 4.4 (3.7 – 5.1)              | 84.8% (79.9% - 88.6%) | 41.8% (36.4% - 47.4%)    | 37.9% (33.1% - 42.9%)            | 21.3% (17.6% - 25.5%)           |
| Non-Hispanic black   | 0.9 (0.8 – 1.1)              | 76.3% (68.3% - 82.8%) | 34.0% (26.7% - 42.1%)    | 27.5% (22.0% - 33.8%)            | 12.7% (8.9% - 17.9%)            |
| Hispanic             | 0.4 (0.3 – 0.5)              | 73.5% (60.2% - 83.5%) | 29.0% (20.9% - 38.7%)    | 24.4% (17.1% - 33.5%)            | 8.2% (4.7% - 13.9%)             |
| SBP, mm Hg           |                              |                       |                          |                                  |                                 |
| 130 – 139            | 1.1 (0.9 – 1.3)              | 89.5% (82.7% - 93.9%) | 88.2% (81.1% - 92.9%)    | 70.5% (60.8% - 78.6%)            | 35.6% (27.1% - 45.2%)           |
| ≥ 140                | 2.0 (1.7 – 2.3)              | 93.9% (89.0% - 96.7%) | 72.1% (65.7% - 77.8%)    | 67.5% (61.1% - 73.3%)            | 38.2% (31.8% - 45.1%)           |
| Treated hypertension |                              |                       |                          |                                  |                                 |
| No                   | 2.4 (2.0 – 2.8)              | 67.2% (59.6% - 74.0%) | 30.1% (24.0% - 37.0%)    | 25.4% (20.1% - 31.6%)            | 15.1% (11.0% - 20.3%)           |
| Yes                  | 3.7 (3.2 – 4.2)              | 92.7% (89.5% - 94.9%) | 45.8% (41.2% - 50.5%)    | 41.1% (36.6% - 45.7%)            | 21.5% (17.7% - 26.0%)           |

---

Numbers in table are million people or percentage (95% confidence interval).

† Calculations for these percentages are based on small ( $n < 30$ ) sample sizes and should be interpreted with caution.

CVD – cardiovascular disease; SBP – systolic blood pressure; SPRINT - Systolic Blood Pressure Intervention Trial; CHD – Coronary heart disease; NHANES – National Health and Nutrition Examination Survey

Treated hypertension was defined by self-reported use of antihypertensive medication with one or more classes of antihypertensive medication identified through the pill bottle review.

SBP criteria include: 130–180 mm Hg on 0 or 1 antihypertensive medication class, 130–170 mm Hg on up to 2 classes, 130–160 mm Hg on up to 3 classes, 130–150 mm Hg on up to 4 classes.

Criteria for high CVD risk condition include: history of CHD (defined in NHANES as self-report of a prior diagnosis of myocardial infarction, angina, or CHD), eGFR of  $< 60$  ml/min/1.73 m<sup>2</sup>, 10-year risk for CVD  $\geq 15\%$  calculated using the Framingham risk score for general clinical practice<sup>1</sup>

Exclusion criteria include history of stroke,  $> 1$  gram proteinuria in 24 hours, heart failure, estimated glomerular filtration rate  $< 20$  ml/min/1.73 m<sup>2</sup> or dialysis treatment in the past year.

\*For the top panel, diabetes is removed as an exclusion criteria, for the bottom panel, history of stroke is removed as an exclusion criteria

**Table S3. Number of US adults < 50 years of age meeting each sequential SPRINT eligibility criteria, overall (top panel) and in subgroups**

|                      | US adults overall     | US adult population < 50 years of age |                    |                               |                               |
|----------------------|-----------------------|---------------------------------------|--------------------|-------------------------------|-------------------------------|
|                      |                       | Age < 50 years                        | + SBP criteria     | + High CVD risk condition     | + No exclusion criteria       |
| Overall              | 214.7 (203.1 - 226.3) | 124.3 (118.2 – 130.5)                 | 16.6 (15.3 – 17.8) | 2.0 (1.7 – 2.4)               | 1.3 (1.0 – 1.6)               |
| Age group            |                       |                                       |                    |                               |                               |
| <30                  | 40.7 (37.9 – 43.4)    | 40.7 (37.9 – 43.4)                    | 3.1 (2.7 – 3.6)    | 0.04 (0.0 – 0.1) <sup>†</sup> | 0.02 (0.0 – 0.1) <sup>†</sup> |
| 30 – 39              | 39.9 (37.6 – 42.1)    | 39.9 (37.6 – 42.1)                    | 4.7 (4.1 – 5.3)    | 0.2 (0.1 – 0.2)               | 0.1 (0.0 – 0.2)               |
| 40 – 49              | 43.8 (40.8 – 46.8)    | 43.8 (40.8 – 46.8)                    | 8.7 (7.9 – 9.5)    | 1.8 (1.5 – 2.2)               | 1.1 (0.9 – 1.4)               |
| Male                 | 103.3 (97.8 – 108.9)  | 61.4 (58.4 – 64.4)                    | 10.9 (10.1 – 11.8) | 1.6 (1.3 – 1.9)               | 1.0 (0.8 – 1.3)               |
| Female               | 111.4 (105.0 – 117.7) | 62.9 (59.5 – 66.4)                    | 5.6 (5.1 – 6.2)    | 0.5 (0.3 – 0.6)               | 0.3 (0.1 – 0.4)               |
| Race-ethnicity       |                       |                                       |                    |                               |                               |
| Non-Hispanic white   | 149.3 (135.4 – 163.2) | 79.4 (72.1 – 86.6)                    | 9.9 (8.5 – 11.3)   | 1.2 (0.9 – 1.5)               | 0.8 (0.6 – 1.1)               |
| Non-Hispanic black   | 24.4 (21.6 – 27.1)    | 15.6 (13.7 – 17.4)                    | 3.3 (2.8 – 3.9)    | 0.4 (0.3 – 0.5)               | 0.2 (0.1 – 0.3)               |
| Hispanic             | 27.5 (23.8 – 31.2)    | 20.6 (18.0 – 23.2)                    | 2.5 (2.1 – 2.9)    | 0.3 (0.2 – 0.4)               | 0.1 (0.1 – 0.2)               |
| SBP, mm Hg           |                       |                                       |                    |                               |                               |
| 130 – 139            | 27.4 (25.5 – 29.4)    | 10.5 (9.5 – 11.4)                     | 10.5 (10.0 – 10.9) | 1.0 (0.7 – 1.2)               | 0.6 (0.4 – 0.8)               |
| ≥ 140                | 30.4 (28.2 – 32.7)    | 6.4 (5.7 – 7.1)                       | 6.1 (5.4 – 6.8)    | 1.1 (0.8 – 1.3)               | 0.6 (0.5 – 0.8)               |
| Treated hypertension |                       |                                       |                    |                               |                               |
| No                   | 169.0 (160.0 – 177.9) | 115.6 (109.9 – 121.3)                 | 13.7 (12.6 – 14.8) | 1.2 (0.9 – 1.5)               | 0.9 (0.6 – 1.1)               |
| Yes                  | 45.7 (42.1 – 49.4)    | 8.8 (7.9 – 9.7)                       | 2.8 (2.4 – 3.2)    | 0.8 (0.6 – 1.0)               | 0.4 (0.3 – 0.5)               |

Numbers in table are million people (95% confidence interval).

<sup>†</sup> Calculations for these numbers are based on small (n<30) sample sizes and should be interpreted with caution.

CVD – cardiovascular disease; SBP – systolic blood pressure; SPRINT - Systolic Blood Pressure Intervention Trial; NHANES – National Health and Nutrition Examination Survey.

Treated hypertension was defined by self-reported use of antihypertensive medication with one or more classes of antihypertensive medication identified through the pill bottle review.

SBP criteria include: 130–180 mm Hg on 0 or 1 antihypertensive medication class, 130–170 mm Hg on up to 2 classes, 130–160 mm Hg on up to 3 classes, 130–150 mm Hg on up to 4 classes.

Criteria for high CVD risk condition include: history of CHD (defined in NHANES as self-report of a prior diagnosis of myocardial infarction, angina, or CHD), eGFR of 20 to 59 ml/min/1.73 m<sup>2</sup>, 10-year risk for CVD ≥ 15% calculated using the Framingham risk score for general clinical practice.<sup>1</sup>

Exclusion criteria include diabetes, history of stroke, > 1gram proteinuria in 24 hours, heart failure, estimated glomerular filtration rate < 20 ml/min/1.73 m<sup>2</sup> or dialysis treatment in the past year.

**Table S4. Number of US adults with diabetes (top panel) and history of stroke (bottom panel) meeting each sequential SPRINT eligibility criteria, overall and in subgroups**

|                      | <b>Diabetes</b>          |                    |                       |                                  |                                 |
|----------------------|--------------------------|--------------------|-----------------------|----------------------------------|---------------------------------|
|                      | <b>Total</b>             | <b>+ Age ≥ 50</b>  | <b>+ SBP criteria</b> | <b>+ High CVD risk condition</b> | <b>+ No exclusion criteria*</b> |
| Overall              | 21.6 (19.9 – 23.2)       | 16.6 (15.2 – 18.1) | 7.5 (6.7 – 8.3)       | 6.9 (6.2 – 7.7)                  | 5.5 (4.8 – 6.2)                 |
| Age group            |                          |                    |                       |                                  |                                 |
| 50 – 59              | 5.5 (4.9 – 6.2)          | 5.5 (4.9 – 6.2)    | 1.8 (1.5 – 2.2)       | 1.5 (1.2 – 1.8)                  | 1.3 (1.0 – 1.6)                 |
| 60 – 74              | 7.6 (6.8 – 8.3)          | 7.6 (6.8 – 8.3)    | 3.8 (3.4 – 4.2)       | 3.6 (3.2 – 4.0)                  | 2.9 (2.5 – 3.2)                 |
| ≥ 75                 | 3.5 (3.1 – 3.9)          | 3.5 (3.1 – 3.9)    | 1.9 (1.6 – 2.1)       | 1.9 (1.6 – 2.1)                  | 1.3 (1.1 – 1.5)                 |
| Male                 | 10.9 (10.0 – 11.9)       | 8.2 (7.5 – 9.0)    | 3.5 (3.0 – 4.0)       | 3.4 (2.9 – 3.9)                  | 2.9 (2.4 – 3.3)                 |
| Female               | 10.6 (9.7 – 11.6)        | 8.4 (7.6 – 9.3)    | 4.0 (3.5 – 4.4)       | 3.6 (3.1 – 4.0)                  | 2.6 (2.2 – 3.0)                 |
| Race-ethnicity       |                          |                    |                       |                                  |                                 |
| Non-Hispanic white   | 13.1 (11.3 – 14.9)       | 10.8 (9.3 – 12.4)  | 4.9 (4.1 – 5.7)       | 4.7 (3.8 – 5.5)                  | 3.6 (2.9 – 4.3)                 |
| Non-Hispanic black   | 3.6 (3.2 – 4.1)          | 2.6 (2.3 – 3.0)    | 1.2 (1.0 – 1.4)       | 1.1 (0.9 – 1.2)                  | 0.8 (0.7 – 1.0)                 |
| Hispanic             | 3.1 (2.5 – 3.8)          | 2.0 (1.5 – 2.4)    | 0.8 (0.6 – 1.0)       | 0.8 (0.6 – 1.0)                  | 0.7 (0.5 – 0.8)                 |
| SBP, mm Hg           |                          |                    |                       |                                  |                                 |
| 130 – 139            | 4.2 (3.7 – 4.7)          | 3.3 (2.9 – 3.8)    | 3.3 (2.8 – 3.7)       | 2.9 (2.5 – 3.3)                  | 2.3 (1.9 – 2.6)                 |
| ≥ 140                | 6.0 (5.3 – 6.6)          | 5.3 (4.7 – 5.9)    | 4.2 (3.7 – 4.7)       | 4.1 (3.6 – 4.5)                  | 3.2 (2.8 – 3.6)                 |
| Treated hypertension |                          |                    |                       |                                  |                                 |
| No                   | 9.5 (8.5 – 10.5)         | 6.2 (5.5 – 6.9)    | 2.6 (2.2 – 3.0)       | 2.4 (2.0 – 2.8)                  | 2.0 (1.8 – 2.2)                 |
| Yes                  | 12.1 (11.1 – 13.0)       | 10.4 (9.5 – 11.4)  | 4.8 (4.3 – 5.4)       | 4.5 (4.0 – 5.0)                  | 3.4 (3.2 – 3.7)                 |
|                      | <b>History of stroke</b> |                    |                       |                                  |                                 |
|                      | <b>Total</b>             | <b>+ Age ≥ 50</b>  | <b>+ SBP criteria</b> | <b>+ High CVD risk condition</b> | <b>+ No exclusion criteria*</b> |
| Overall              | 6.1 (5.4 – 6.8)          | 5.1 (4.4 – 5.7)    | 2.4 (2.0 – 2.8)       | 2.1 (1.8 – 2.5)                  | 1.2 (0.9 – 1.4)                 |
| Age group            |                          |                    |                       |                                  |                                 |
| 50 – 59              | 0.9 (0.7 – 1.1)          | 0.9 (0.7 – 1.1)    | 0.3 (0.2 – 0.5)       | 0.2 (0.1 – 0.3)                  | 0.1 (0.0 – 0.2)                 |
| 60 – 74              | 2.1 (1.7 – 2.4)          | 2.1 (1.7 – 2.4)    | 1.1 (0.8 – 1.3)       | 0.9 (0.7 – 1.0)                  | 0.4 (0.3 – 0.5)                 |
| ≥ 75                 | 2.0 (1.7 – 2.4)          | 2.0 (1.7 – 2.4)    | 1.0 (0.8 – 1.2)       | 1.0 (0.8 – 1.2)                  | 0.6 (0.5 – 0.8)                 |
| Male                 | 2.6 (2.2 – 2.9)          | 2.3 (2.0 – 2.6)    | 0.9 (0.7 – 1.1)       | 0.9 (0.7 – 1.1)                  | 0.5 (0.4 – 0.7)                 |
| Female               | 3.5 (3.0 – 4.1)          | 2.8 (2.3 – 3.2)    | 1.5 (1.2 – 1.8)       | 1.2 (1.0 – 1.5)                  | 0.6 (0.5 – 0.8)                 |
| Race-ethnicity       |                          |                    |                       |                                  |                                 |
| Non-Hispanic white   | 4.4 (3.7 – 5.1)          | 3.7 (3.1 – 4.3)    | 1.8 (1.5 – 2.2)       | 1.7 (1.4 – 2.0)                  | 0.9 (0.7 – 1.1)                 |
| Non-Hispanic black   | 0.9 (0.8 – 1.1)          | 0.7 (0.6 – 0.9)    | 0.3 (0.2 – 0.4)       | 0.3 (0.2 – 0.3)                  | 0.1 (0.1 – 0.2)                 |
| Hispanic             | 0.4 (0.3 – 0.5)          | 0.3 (0.2 – 0.4)    | 0.1 (0.1 – 0.2)       | 0.1 (0.0 – 0.1)                  | 0.0 (0.0 – 0.1)                 |
| SBP, mm Hg           |                          |                    |                       |                                  |                                 |
| 130 – 139            | 1.1 (0.9 – 1.3)          | 1.0 (0.8 – 1.2)    | 1.0 (0.7 – 1.2)       | 0.8 (0.6 – 0.9)                  | 0.4 (0.2 – 0.5)                 |
| ≥ 140                | 2.0 (1.7 – 2.3)          | 1.9 (1.6 – 2.2)    | 1.5 (1.2 – 1.7)       | 1.4 (1.1 – 1.6)                  | 0.8 (0.6 – 1.0)                 |
| Treated hypertension |                          |                    |                       |                                  |                                 |

|     |                 |                 |                 |                 |                 |
|-----|-----------------|-----------------|-----------------|-----------------|-----------------|
| No  | 2.4 (2.0 – 2.8) | 1.6 (1.3 – 1.9) | 0.7 (0.5 – 0.9) | 0.6 (0.5 – 0.8) | 0.4 (0.2 – 0.5) |
| Yes | 3.7 (3.2 – 4.2) | 3.4 (3.0 – 3.9) | 1.7 (1.4 – 2.0) | 1.5 (1.3 – 1.8) | 0.8 (0.6 – 1.0) |

Numbers in table are million people (95% confidence interval).

CVD – cardiovascular disease; SBP – systolic blood pressure; SPRINT - Systolic Blood Pressure Intervention Trial; NHANES – National Health and Nutrition Examination Survey.

Treated hypertension was defined by self-reported use of antihypertensive medication with one or more classes of antihypertensive medication identified through the pill bottle review.

SBP criteria include: 130–180 mm Hg on 0 or 1 antihypertensive medication class, 130–170 mm Hg on up to 2 classes, 130–160 mm Hg on up to 3 classes, 130–150 mm Hg on up to 4 classes.

Criteria for high CVD risk condition include: history of CHD (defined in NHANES as self-report of a prior diagnosis of myocardial infarction, angina, or CHD), eGFR of <60 ml/min/1.73 m<sup>2</sup>, 10-year risk for CVD ≥ 15% calculated using the Framingham risk score for general clinical practice.<sup>1</sup>

Exclusion criteria include history of stroke, > 1gram proteinuria in 24 hours, heart failure, estimated glomerular filtration rate < 20 ml/min/1.73 m<sup>2</sup> or dialysis treatment in the past year.

\*For the top panel, diabetes is removed as an exclusion criteria, for the bottom panel, history of stroke is removed as an exclusion criteria

## References

1. D'Agostino RB, Sr., Vasan RS, Pencina MJ, Wolf PA, Cobain M, Massaro JM, Kannel WB. General cardiovascular risk profile for use in primary care: The framingham heart study. *Circulation*. 2008;117:743-753.
